# Supplementary material for: A new route for substitution of the bridging acetate on the oxo-centered triruthenium acetate cluster
Source: Royal Society of Chemistry journal article supplement (doi:10.1039/b901050p), 2009-01-01
Supplement: b901050p.pdf [file b901050p.pdf]

Supplementary Information for

A new route for substitution of the bridging acetate on the oxo-centered triruthenium acetate cluster

Hidetaka Yuge, Shin-ichiro Asahi and T. Ken Miyamoto\*

*Department of Chemistry, School of Science, Kitasato University, Kitasato, Sagami-hara, Kanagawa 228-8555, Japan*

**General.**

All reactions were carried out under N<sub>2</sub> atmosphere. [Ru<sub>3</sub>O(OAc)<sub>6</sub>(Mepy)<sub>3</sub>] was prepared according to ref 1 replacing pyridine with Mepy. All solvents except THF were used without distillation; THF was distilled from sodium/benzophenone ketyl. <sup>1</sup>H NMR spectra (δ relative to internal TMS at 0) were measured on a Bruker Avance II 600 spectrometer at 600 MHz and <sup>19</sup>F NMR spectra (δ relative to external C<sub>6</sub>F<sub>6</sub> in CHCl<sub>3</sub> at -162.9) were on a Bruker ARX300 at 282.4 MHz. UV-vis spectra were recorded on a Jasco V-570 spectrometer. Mass spectra were recorded on a Hitachi M-2500 mass spectrometer.

**Preparation of [Ru<sub>3</sub>O(OAc)<sub>6</sub>(Mepy)<sub>2</sub>(CN<sup>t</sup>-Bu)] 1**

A solution of [Ru<sub>3</sub>O(OAc)<sub>6</sub>(Mepy)<sub>3</sub>] (763 mg, 0.80 mmol) and *tert*-butylisocyanide (0.10 mL, 0.88 mmol) in THF (80 mL) was refluxed for 1 h. After removal of the volatiles *in vacuo*, the residue was chromatographed on a silica-gel column with ethyl acetate. The first yellow band was discarded and the second blue band was collected and evaporated to dryness. Yield 594 mg (0.63 mmol, 79 %). <sup>1</sup>H NMR (CDCl<sub>3</sub>): δ 9.30 (d, *J* = 6.4 Hz, 4H), 7.77 (d, *J* = 6.4 Hz, 4H), 2.76 (s, 6H), 2.07 (s, 12H), 1.85 (m, 9H+6H). UV/Vis (CH<sub>2</sub>Cl<sub>2</sub>): λ<sub>max</sub> (log ε) 248 (4.45), 341 (3.92), 671 (3.68), 816 nm (3.64). IR (Nujol, cm<sup>-1</sup>): 2047 [ν(C≡N)]. MS (SI): *m/z* 943 [M<sup>+</sup>]. Anal. Calc. for C<sub>29</sub>H<sub>41</sub>N<sub>3</sub>O<sub>13</sub>Ru<sub>3</sub>: C, 36.94; H, 4.38; N, 4.46. Found: C, 37.29; H, 4.54; N, 4.39 %.

**Synthesis of [Ru<sub>3</sub>O(OAc)<sub>5</sub>(μ-Cl)(Mepy)<sub>2</sub>(CN<sup>t</sup>-Bu)] 2a**

A solution of **1** (188 mg, 0.20 mmol) and acetyl chloride (0.20 ml) in THF (10 ml) was refluxed for 1 h. The resulting solution was filtered through a bed of alumina-gel. The eluent was purified by silica-gel column chromatography with ethyl acetate. The greenish-blue eluent was collected and evaporated to dryness. Yield 54 mg (0.059 mmol, 30%). Replacing acetyl chloride with triethylsilyl chloride the same procedure afforded **2a** in a 36 % yield. <sup>1</sup>H NMR (CDCl<sub>3</sub>): δ 9.24 (d, *J* = 5.0 Hz, 2H), 9.07 (d, *J* = 5.0 Hz, 2H), 7.82 (d, *J* = 6.4 Hz, 2H), 7.71 (d, *J* = 6.4 Hz, 2H), 2.79 (s,

3H), 2.75 (s, 3H), 2.58 (s, 3H), 2.11 (s, 3H), 1.96 (s, 3H), 1.94 (s, 3H), 1.82 (s, 3H), 1.78 (s, 9H). UV/Vis (CH<sub>2</sub>Cl<sub>2</sub>):  $\lambda_{\text{max}}$  (log  $\epsilon$ ) 247 (4.41), 345 (3.94), 641 (3.68), 810 nm (3.53). IR (Nujol, cm<sup>-1</sup>): 2048 [v(C≡N)]. MS (SI):  $m/z$  920 [M<sup>+</sup>]. Anal. Calc. for C<sub>27</sub>H<sub>38</sub>ClN<sub>3</sub>O<sub>11</sub>Ru<sub>3</sub>: C, 35.28; H, 4.17; N, 4.57. Found: C, 35.39; H, 4.20; N, 4.58 %.

### Synthesis of [Ru<sub>3</sub>O(OAc)<sub>5</sub>(μ-OEt)(Mepy)<sub>2</sub>(CN<sup>*t*</sup>-Bu)] **3**

A solution of **2a** (103 mg, 0.112 mmol) and sodium acetylacetonate monohydrate (96 mg, 0.69 mmol) in EtOH (9 mL) was stirred for 2 d at rt. After removal of the volatiles *in vacuo*, the residue was extracted with chloroform, and chromatographed by silica-gel column with ethyl acetate. Yield 40 mg (0.043 mmol, 38 %). <sup>1</sup>H NMR (C<sub>6</sub>D<sub>6</sub>):  $\delta$  9.85 (d,  $J$  = 6.3 Hz, 2H), 9.50 (d,  $J$  = 6.3 Hz, 2H), 7.17 (d,  $J$  = 5.6 Hz, 2H), 7.14 (d,  $J$  = 5.6 Hz, 2H), 2.75 (s, 3H), 2.24 (s, 3H), 2.21 (s, 3H), 2.12 (s, 3H), 2.01 (s, 3H), 2.00 (s, 3H), 1.98 (s, 3H), 1.56 (s, 9H), 1.00 (m, 2H), 0.93 (t,  $J$  = 6.9 Hz, 3H). UV/Vis (CH<sub>2</sub>Cl<sub>2</sub>):  $\lambda_{\text{max}}$  (log  $\epsilon$ ) 247 (4.47), 356 (3.96), 654 (3.75), 807 nm (3.65). IR (Nujol, cm<sup>-1</sup>): 2033 [v(C≡N)]. MS (SI):  $m/z$  930 [M<sup>+</sup>]. Anal. Calc. for C<sub>29</sub>H<sub>45</sub>N<sub>3</sub>O<sub>13</sub>Ru<sub>3</sub> (= **3**·H<sub>2</sub>O): C, 36.79; H, 4.79; N, 4.44. Found: C, 36.61; H, 4.72; N, 4.54%.

### Synthesis of [Ru<sub>3</sub>O(OAc)<sub>5</sub>(μ-O<sub>2</sub>CEt)(Mepy)<sub>2</sub>(CN<sup>*t*</sup>-Bu)] **4a**

A solution of **2a** (84 mg, 0.091 mmol) and sodium propionate (61 mg, 0.64 mmol) in EtOH (8 mL) was stirred for 2 d at rt. After removal of the volatiles *in vacuo*, the residue was extracted with chloroform, and chromatographed by silica-gel column with chloroform. Yield 21 mg (0.022 mmol, 26 %). <sup>1</sup>H NMR (CDCl<sub>3</sub>):  $\delta$  9.36 (d,  $J$  = 6.4 Hz, 2H), 9.18 (d,  $J$  = 6.4 Hz, 2H), 7.70 (m, 4H), 2.80 (s, 3H), 2.74 (s, 3H), 2.27 (m, 2H), 2.04 (s, 3H), 2.02 (s, 6H), 1.85 (s, 9H), 1.84 (s, 3H), 1.81 (s, 3H), 0.72 (t,  $J$  = 7.5 Hz, 3H). UV/Vis (CH<sub>2</sub>Cl<sub>2</sub>):  $\lambda_{\text{max}}$  (log  $\epsilon$ ) 248 (4.44), 344 (3.92), 672 (3.67), 814 nm (3.63). MS (SI):  $m/z$  957 [M<sup>+</sup>]. Anal. Calc. for C<sub>31.2</sub>H<sub>45.8</sub>N<sub>3</sub>O<sub>13</sub>Ru<sub>3</sub> (= **4a**·0.2hexane): C, 38.47; H, 4.74; N, 4.31. Found: C, 38.34; H, 4.86; N, 4.33%.

### Synthesis of [Ru<sub>3</sub>O(OAc)<sub>5</sub>(μ-O<sub>2</sub>CCF<sub>3</sub>)(Mepy)<sub>2</sub>(CN<sup>*t*</sup>-Bu)] **4b**

A solution of **2a** (55 mg, 0.060 mmol) and sodium trifluoroacetate (44 mg, 0.32 mmol) in EtOH (5 mL) was stirred for 3 d at rt. After removal of the volatiles *in vacuo*, the residue was extracted with chloroform, and chromatographed by silica-gel column with benzene/ethyl acetate (v/v, 1:1). Yield 13 mg (0.013 mmol, 22 %). <sup>1</sup>H NMR (CDCl<sub>3</sub>):  $\delta$  9.27 (d,  $J$  = 6.2 Hz, 2H), 9.12 (d,  $J$  = 6.2 Hz, 2H), 7.80 (d,  $J$  = 6.1 Hz, 2H), 7.70 (d,  $J$  = 6.1 Hz, 2H), 2.81 (s, 3H), 2.77 (s, 3H), 2.10 (s, 3H), 2.05 (s, 3H), 1.99 (s, 3H), 1.83 (m, 9H+3H), 1.82 (s, 3H). <sup>19</sup>F NMR (CDCl<sub>3</sub>):  $\delta$  -76.1 (s). UV/Vis (CH<sub>2</sub>Cl<sub>2</sub>):  $\lambda_{\text{max}}$  (log  $\epsilon$ ) 248 (4.44), 336 (3.98), 666 (3.67), 806 nm (3.63). MS (SI):  $m/z$  997 [M<sup>+</sup>]. Anal. Calc. for C<sub>29</sub>H<sub>38</sub>F<sub>3</sub>N<sub>3</sub>O<sub>13</sub>Ru<sub>3</sub>: C, 34.94; H, 3.84; N, 4.22. Found: C, 35.11; H, 4.01; N, 4.19%.

### Synthesis of $[\text{Ru}_3\text{O}(\text{OAc})_5(\mu\text{-SEt}_2)(\text{Mepy})_2(\text{CN}t\text{-Bu})](\text{CF}_3\text{SO}_3)$ **5**

A solution of **2a** (74 mg, 0.080 mmol), diethyl sulfide (0.10 ml) and thallium(I) trifluoromethanesulfonate (60.5 mg) in THF (8 mL) was refluxed for 2 h. After removal of the volatiles *in vacuo*, the residue was extracted with  $\text{CHCl}_3$ , and chromatographed by silica-gel column with  $\text{CHCl}_3/\text{acetone}$  (v/v, 3:1). Yield 44 mg (0.039 mmol, 49 %).  $^1\text{H}$  NMR ( $\text{CDCl}_3$ ):  $\delta$  8.97 (d,  $J$  = 6.3 Hz, 2H), 8.94 (d,  $J$  = 6.3 Hz, 2H), 7.95 (d,  $J$  = 6.4 Hz, 2H), 7.83 (d,  $J$  = 6.4 Hz, 2H), 2.92 (s, 3H), 2.85 (s, 3H), 2.56–2.45 (m, 4H), 2.44 (s, 3H), 2.31 (s, 3H), 2.04 (s, 3H), 2.00 (s, 3H), 1.83 (s, 3H), 1.64 (s, 9H), 1.08 (t,  $J$  = 6.6 Hz, 3H), 1.02 (t,  $J$  = 7.5 Hz, 3H). UV/Vis ( $\text{CH}_2\text{Cl}_2$ ):  $\lambda_{\text{max}}$  (log  $\epsilon$ ) 229 (4.42), 323 (4.03), 602 (3.74), 878 nm (3.37). MS (SI):  $m/z$  975  $[(\text{M}-\text{CF}_3\text{SO}_3)^+]$ . Anal. Calc. for  $\text{C}_{33}\text{H}_{50}\text{F}_3\text{N}_3\text{O}_{15}\text{Ru}_3\text{S}$  (= **5**·0.5hexane): C, 35.36; H, 4.50; N, 3.75. Found: C, 35.25; H, 4.51; N, 3.77%.

### Reference

- 1) J. A. Baumann, D. J. Salmon, S. T. Wilson, T. J. Meyer and W. E. Hatfield, *Inorg. Chem.*, 1978, **17**, 3342.

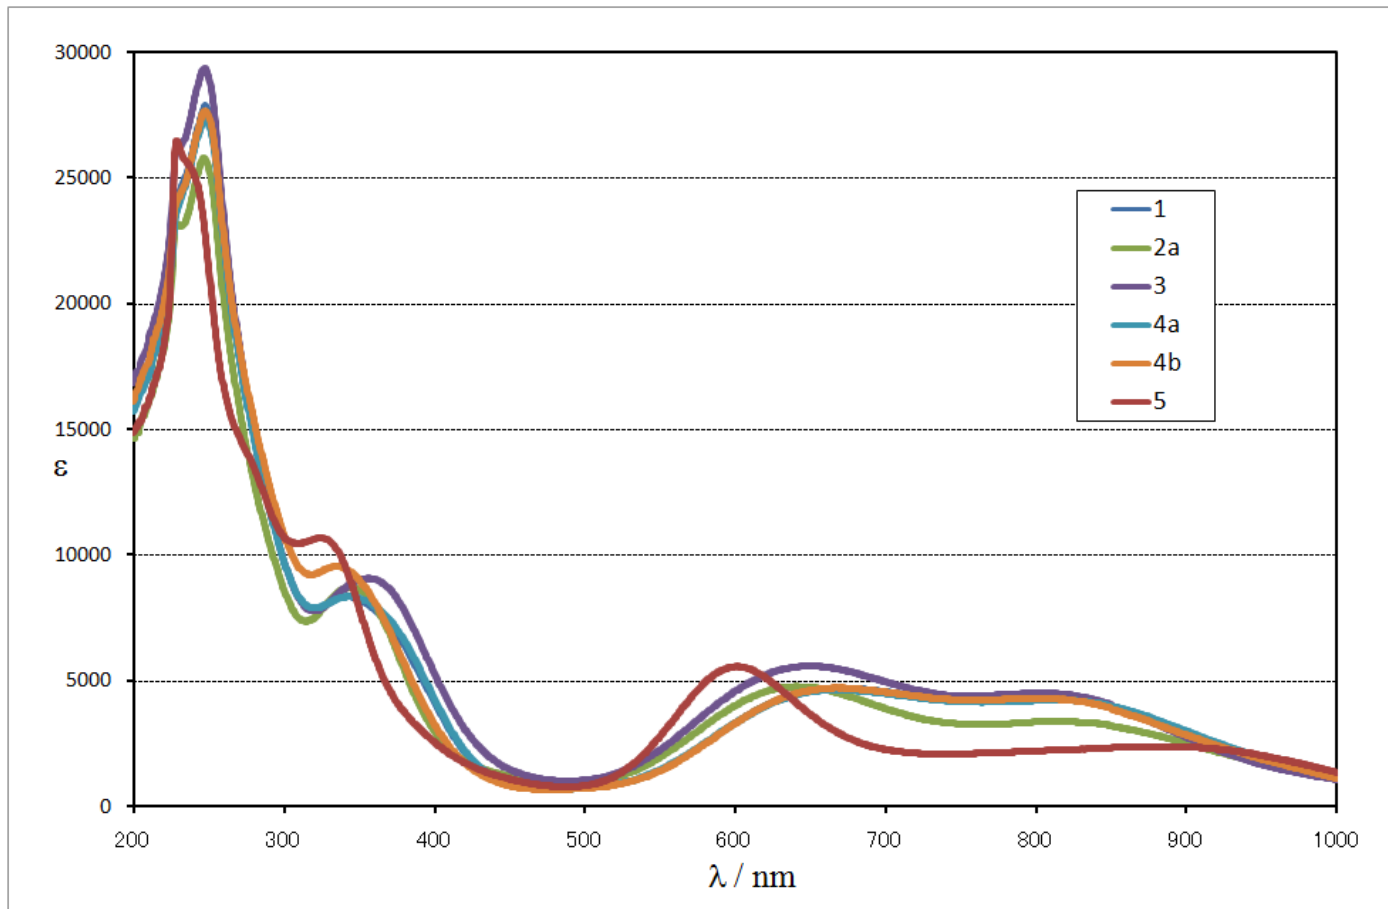

Figure S1. UV/Vis spectra of **1**, **2a**, **3**, **4a**, **4b** and **5**
